# Supplementary material for: Nitrogen and sulfur co-doped cobalt carbon catalysts for ethylbenzene oxidation with synergistically enhanced performance
Source: Royal Society of Chemistry journal article supplement (doi:10.1039/c9ra00672a), 2019-01-01
Supplement: c9ra00672a1.pdf [file c9ra00672a1.pdf]

## Supporting Information

### **Nitrogen and sulfur co-doped cobalt carbon catalysts for ethylbenzene oxidation with synergistically enhanced performance**

Sheng Chen,<sup>a</sup> Yujie Wu,<sup>a</sup> Shanshan Jie,<sup>a</sup> Chak Tong Au,<sup>b</sup> and Zhigang Liu<sup>a,\*</sup>

<sup>a</sup> State Key Laboratory of Chemo/Biosensing and Chemometrics, College of Chemistry and Chemical Engineering, Hunan University, Changsha 410082, China

<sup>b</sup> College of Chemistry and Chemical Engineering, Hunan Institute of Engineering, Xiangtan, 411104, China

#### **Corresponding author**

E-mail: [liuzhigang@hnu.edu.cn](mailto:liuzhigang@hnu.edu.cn) (Z.G. Liu)

#### **Materials**

Melamine,  $\text{Co}(\text{OAc})_2 \cdot 4\text{H}_2\text{O}$ ,  $\text{C}_2\text{H}_4\text{O}_2\text{S}$ , glucose monohydrate ( $\text{C}_6\text{H}_{12}\text{O}_6 \cdot \text{H}_2\text{O}$ ), bromobenzene, 1,4-dichlorobenzene, and anhydrous ethanol were from commercial sources and were used without any further purification.

#### **Results and discussion**

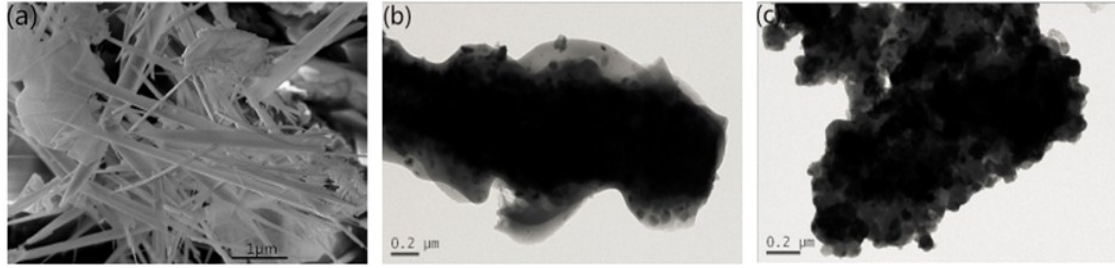

**Figure S1.** SEM image of (a) Co-N-S-C-700; TEM images of (b) Co-S-C-700 and (c) r-Co-N-S-C-700 (re-activated)

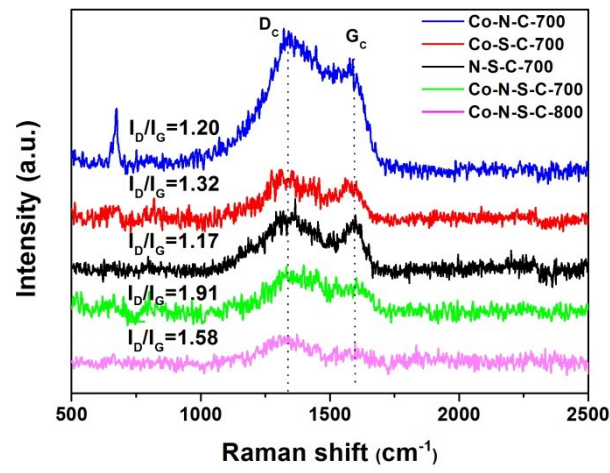

**Figure S2.** Raman spectra of Co-N-C-700, Co-S-C-700, N-S-C-700, Co-N-S-C-700, and Co-N-S-C-800 samples

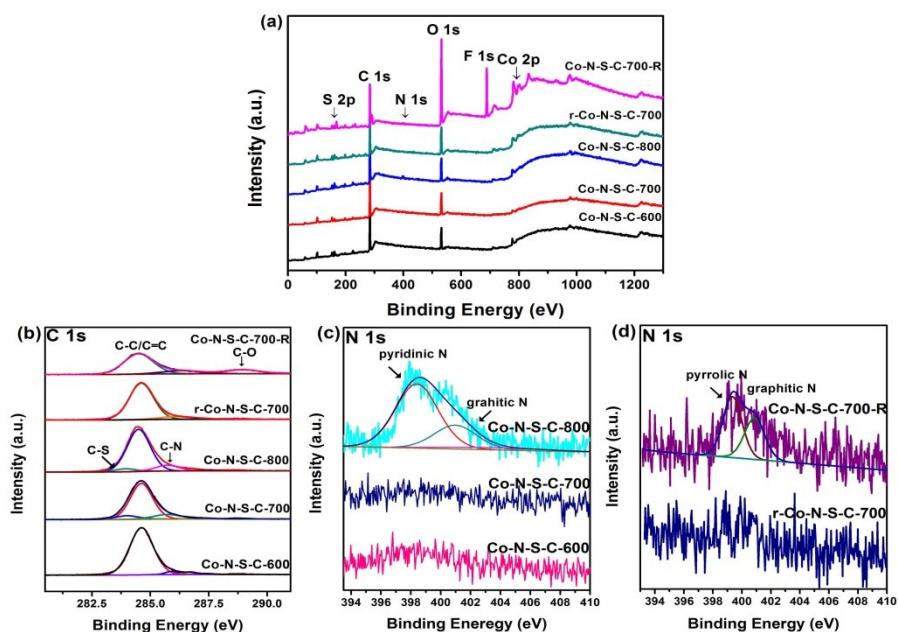

**Figure S3.** (a) XPS survey spectra of various Co-N-S-C-T samples; (b) High-resolution C 1s spectra of Co-N-S-C-T; High-resolution N 1s spectra of (c) Co-N-S-C-T, and (d) Co-N-S-C-700-R and r-Co-N-S-C-700 samples

**Table S1.** Chemical composition of different catalysts based on XPS data

| Sample         | Content (at%) |      |       |       |      |       |
|----------------|---------------|------|-------|-------|------|-------|
|                | C             | N    | O     | S     | Co   | F     |
| Co-N-S-C-600   | 73.78         | 1.99 | 12.76 | 9.40  | 2.09 | -     |
| Co-N-S-C-700   | 74.81         | 2.63 | 11.81 | 9.43  | 1.32 | -     |
| Co-N-S-C-800   | 74.85         | 3.19 | 9.35  | 10.66 | 1.95 | -     |
| r-Co-N-S-C-700 | 72.77         | 1.17 | 13.24 | 9.29  | 3.52 | -     |
| Co-N-S-C-700-R | 42.45         | 1.15 | 28.40 | 11.59 | 6.41 | 10.00 |

**Table S2.** The comparison of the work and the recently reported work

| Catalysts                           | Dopants | Conv.(%)<br>a | Select.(%) <sup>b</sup> | Cond. <sup>c</sup>                     | Ref.      |
|-------------------------------------|---------|---------------|-------------------------|----------------------------------------|-----------|
| Co-N-S-C-700                        | N, S    | 48            | 85                      | 0.8 MPa O <sub>2</sub> ,<br>120 °C, 5h | This work |
| Co@GCNs-800                         | N       | 68.1          | 93.2                    | 0.8 MPa O <sub>2</sub> ,<br>120 °C, 5h | [1]       |
| S-CoNC                              | N, S    | 62            | 91                      | 0.8 MPa O <sub>2</sub> ,<br>120 °C, 5h | [2]       |
| Co-N-C-Phen                         | N       | 40            | 75                      | 0.8 MPa O <sub>2</sub> ,<br>120 °C, 5h | [3]       |
| Co <sub>3</sub> O <sub>4</sub> @GNC | N       | 65.8          | 72.6                    | 20 bar air, 140<br>°C, 4h              | [4]       |
| CoNC-10                             | N       | 22            | 75                      | 0.8 MPa O <sub>2</sub> ,<br>120 °C, 5h | [5]       |

<sup>[a]</sup> Conversion of ethylbenzene; <sup>[b]</sup> Selectivity to acetophenone; <sup>[c]</sup> Condition of reaction.

**Table S3.** Recycling performance of Co-N-S-C-700 in oxidation of ethylbenzene with O<sub>2</sub><sup>[a]</sup>

| Entry | Catalyst         | Conv.(%) <sup>[b]</sup> | Sel.(%) <sup>[c]</sup> |    |    |
|-------|------------------|-------------------------|------------------------|----|----|
|       |                  |                         | AP                     | PA | BA |
| 1     | Co-N-S-C-700-R   | 8                       | 88                     | 10 | 2  |
| 2     | r-Co-N-S-C-700-2 | 49                      | 86                     | 13 | 1  |
| 3     | r-Co-N-S-C-700-3 | 52                      | 87                     | 13 | 0  |

<sup>[a]</sup> Reaction conditions: ethylbenzene (10 ml), catalyst (28 mg), O<sub>2</sub> (0.8 MPa), 120 °C and 5 h. <sup>[b]</sup> Conversion of ethylbenzene. <sup>[c]</sup> Selectivity to acetophenone (AP), phenethyl alcohol (PA) and benzaldehyde (BA).

- [1] X. Lin, Z. Z. Nie, L. Y. Zhang, S. C. Mei, Y. Chen, B. S. Zhang, R. L. Zhu and Z. G. Liu, *Green Chem.*, 2017, 19, 2164-2173.
- [2] X. Lin, S. S. Jie and Z. G. Liu, *Mol. Catal*, 2018, 455, 143–149.
- [3] S. S. Jie, C. Q. Yang, Y. Chen and Z. G. Liu, *Mol. Catal*, 2018, 458, 1–8.
- [4] S. Pendem, R. Singuru, C. Sarkar, B. Joseph, J. Lee, D. B. Shinde, Z. P. Lai and J. Mondal, *Appl. Nano. Mater. (ACS)*. 2018, 1, 4836–4851.
- [5] Y. Chen, L. Fu, Z. Liu, *Chem. Commun.* 2015, 51, 16637–16640.
